# Supplementary material for: Hypoxic preconditioning potentiates the trophic effects of mesenchymal stem cells on co-cultured human primary hepatocytes
Source: PubMed Central journal article supplement (PMC4667488; doi:10.1186/s13287-015-0218-7), 2015-12-01

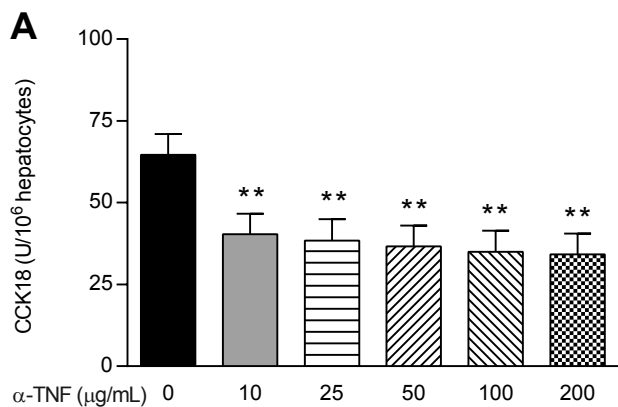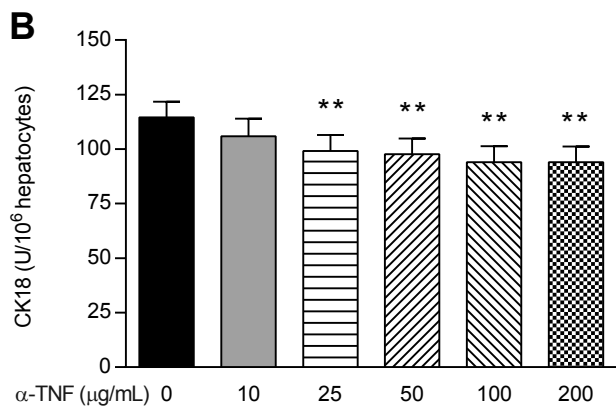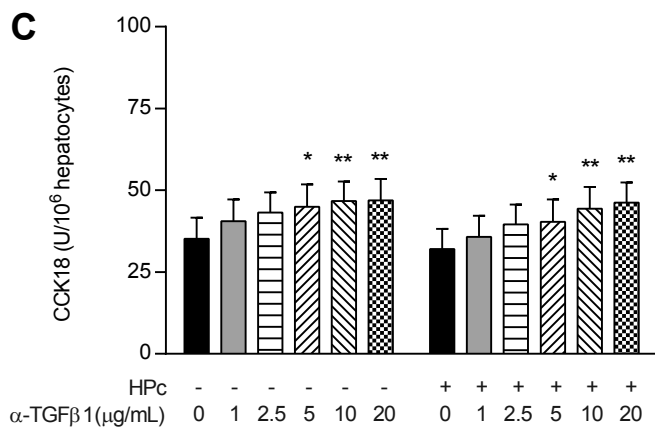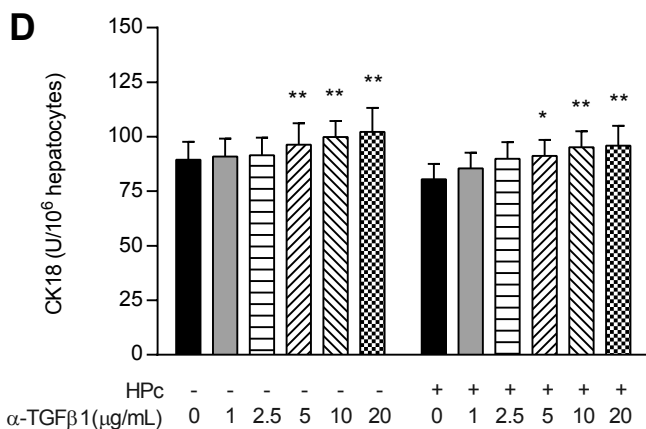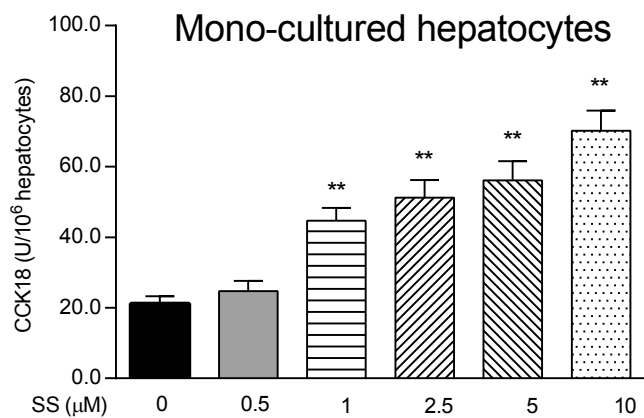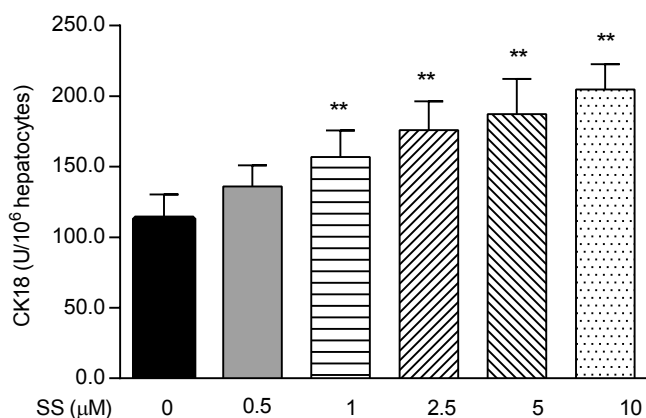

Supplement: 13287_2015_218_MOESM1_ESM.pdf [file 13287_2015_218_MOESM1_ESM.pdf]
